# Supplementary material
Source: Copernicus journal article supplement (doi:10.5194/gchron-8-387-2026)
Supplement: Supplementary file 1 [file Figure S1.pdf › Figure S1.pdf]

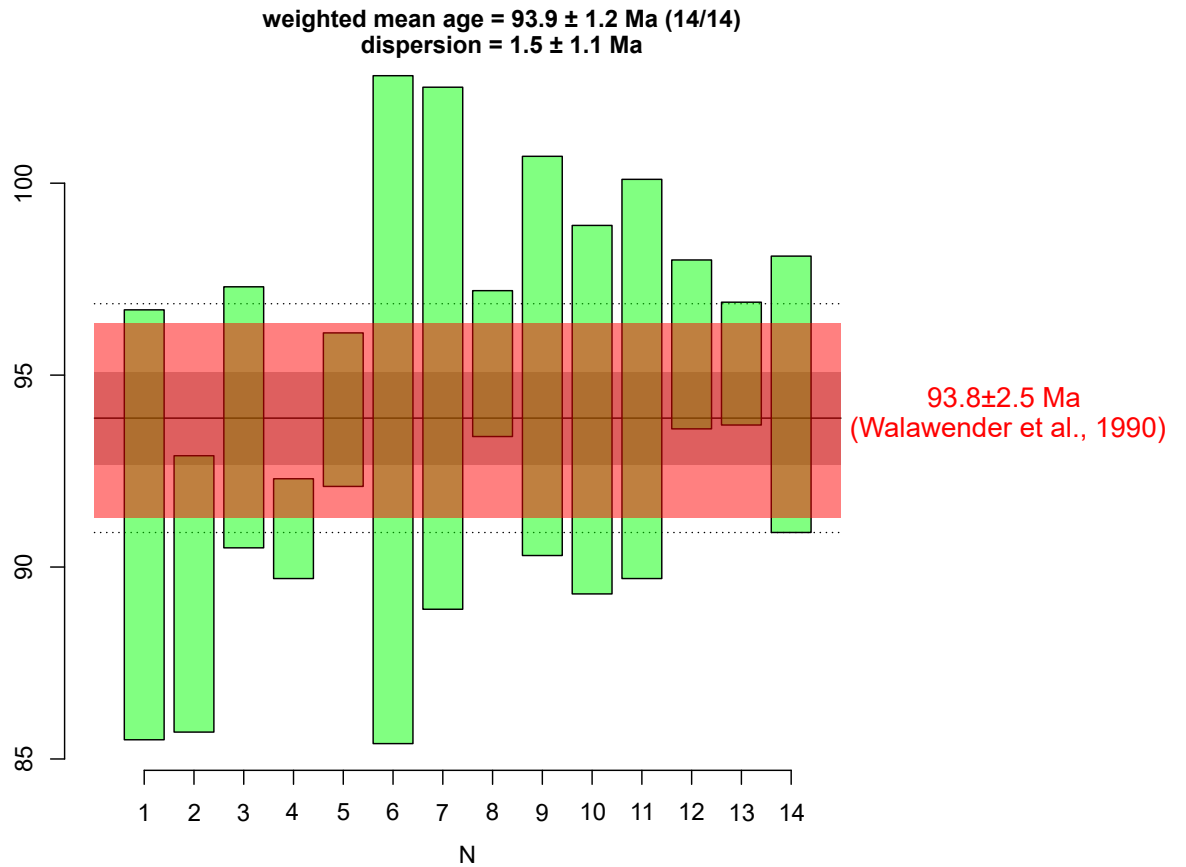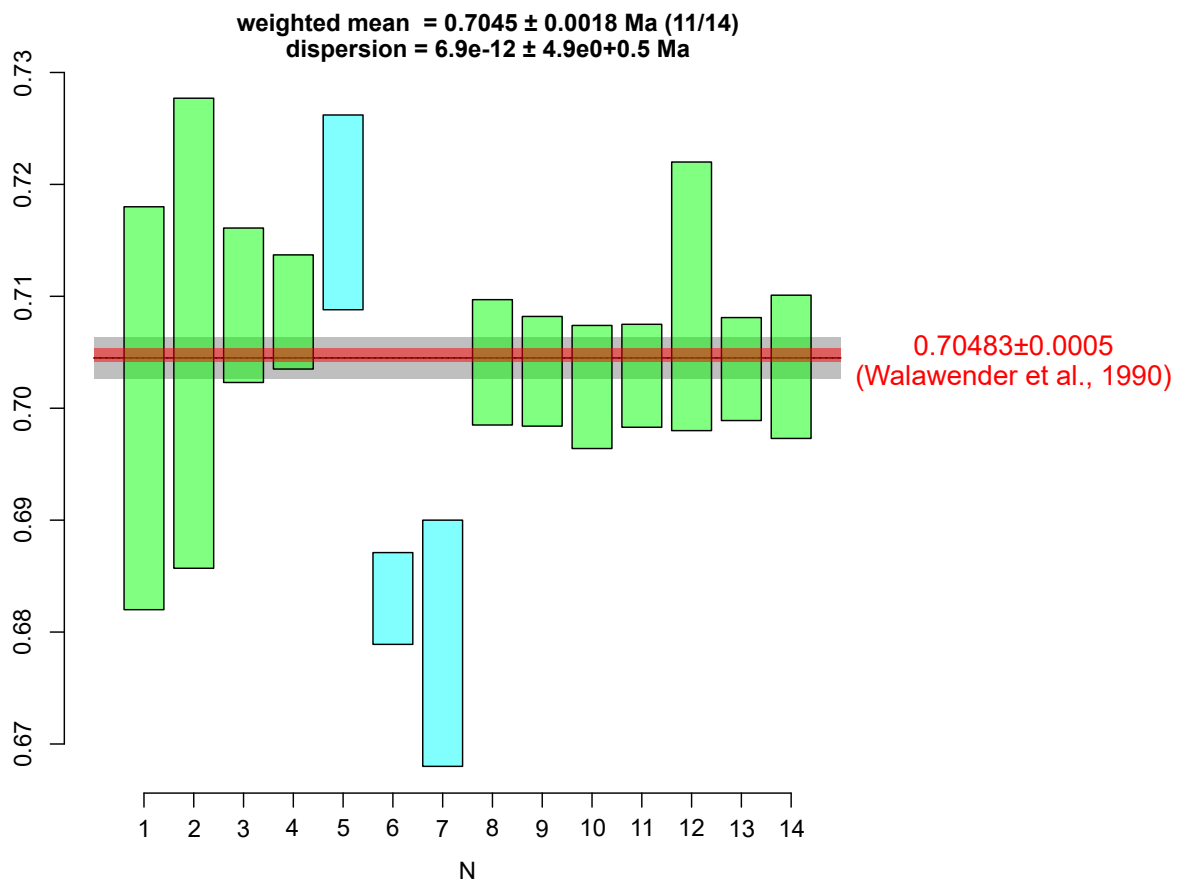

Figure S1. Session-by-session summary of La Posta biotite secondary reference material analyses acquired over a three-year period (14 sessions). Upper panel: isochron ages per session compared to the weighted mean age of  $93.9 \pm 1.2$  Ma ( $2\sigma$ ) and the ID-TIMS reference value of  $93.8 \pm 2.5$  Ma (Walawender et al., 1990). Lower panel: regression intercepts ( $^{87}\text{Sr}/^{86}\text{Sr}$ ) per session compared to the weighted mean of  $0.7045 \pm 0.0018$  ( $2\sigma$ ) and the ID-TIMS reference value of  $0.70483 \pm 0.0005$  (Walawender et al., 1990). Green bars indicate sessions used in both calculations; blue bars indicate sessions excluded from the intercept weighted mean. The consistency of both age and intercept values across sessions demonstrates robust long-term analytical stability.
