# Supplementary material
Source: Copernicus journal article supplement (doi:10.5194/gchron-8-387-2026)
Supplement: Supplementary file [file gchron-8-387-2026-supplement-title-page.pdf › gchron-8-387-2026-supplement-title-page.pdf]

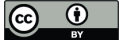

*Supplement of*

**Dating circulations of hydrothermal fluids in the crystalline basements of unconformity-related metal deposits using in situ Rb / Sr geochronology: proof of concept**

**Quentin Boulogne et al.**

*Correspondence to:* Quentin Boulogne (quentin.boulogne@univ-lorraine.fr)

- gchron-8-387-2026-supplement-title-page.pdf
- Figure S1.pdf
- Table S1.xlsx

The copyright of individual parts of the supplement might differ from the article licence.
